# Supplementary material
Source: Springer Nature journal article supplement (https://www.springermedizin.de/resource/supplementary/12883_2013_892_MOESM1_ESM.pdf/9456090)

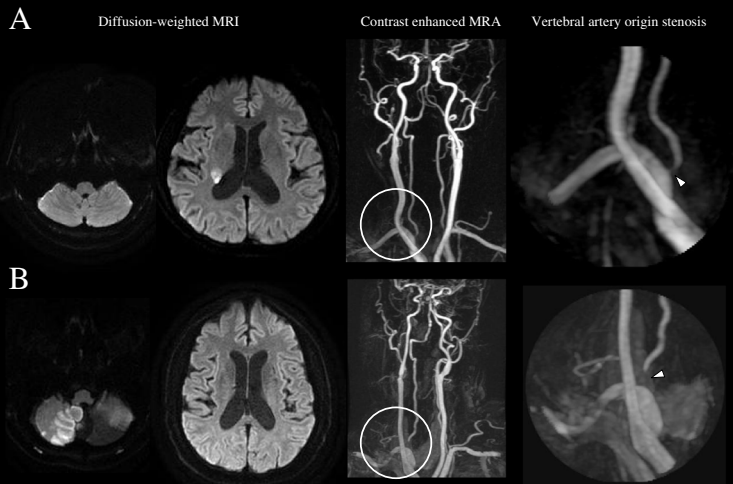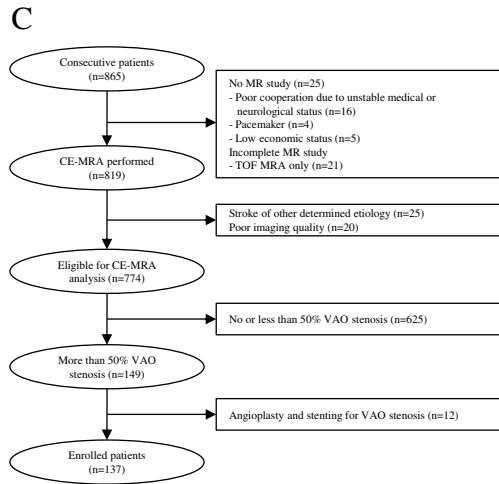

Supplement: MOESM1 [file 9456090]
